# Supplementary material for: Efficacy of Sofosbuvir plus Ledipasvir in Egyptian patients with COVID-19 compared to standard treatment: Randomized controlled trial
Source: bioRxiv or medRxiv preprint supplement (doi:10.1101/2021.05.19.21257429), 2021-05-21
Supplement: Supplementary file [file media-1.pdf]

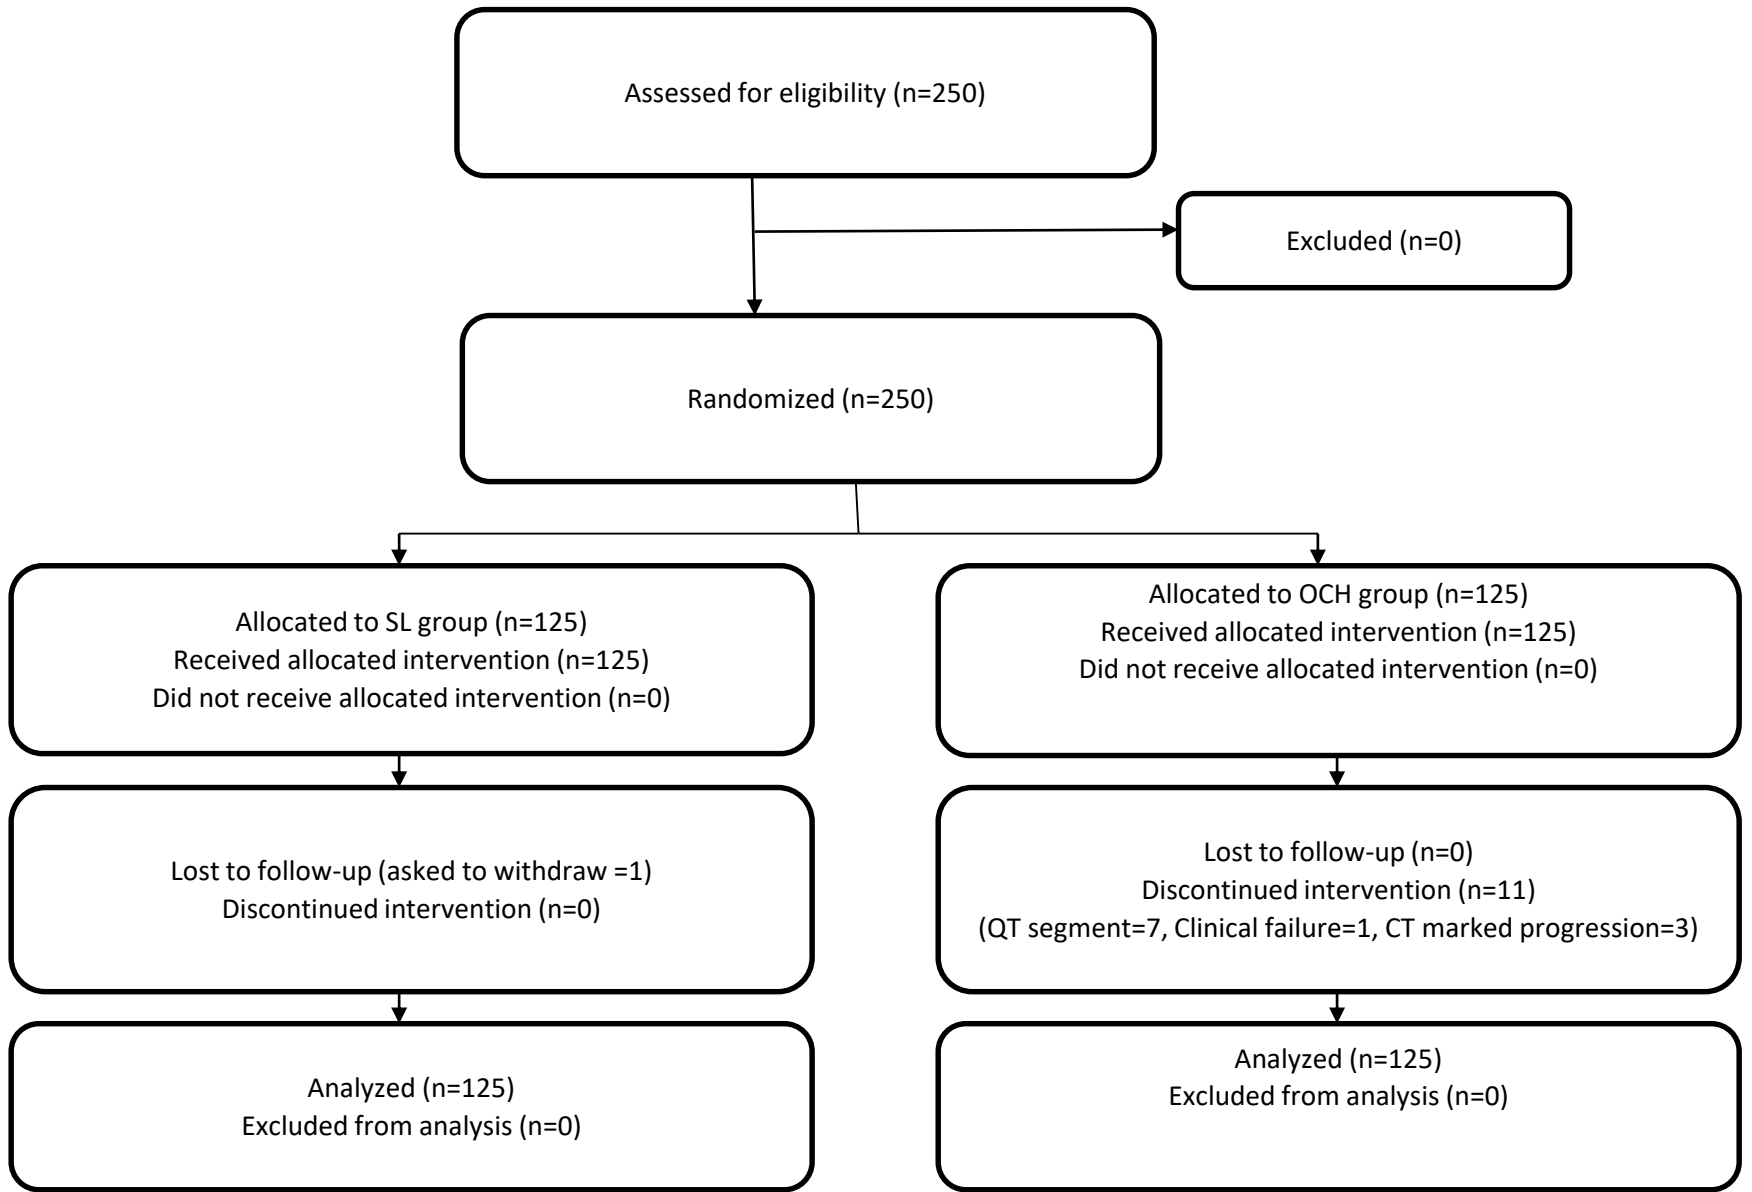

Figure 1: Study flow diagram

### Kaplan-Meier plot for treatment groups

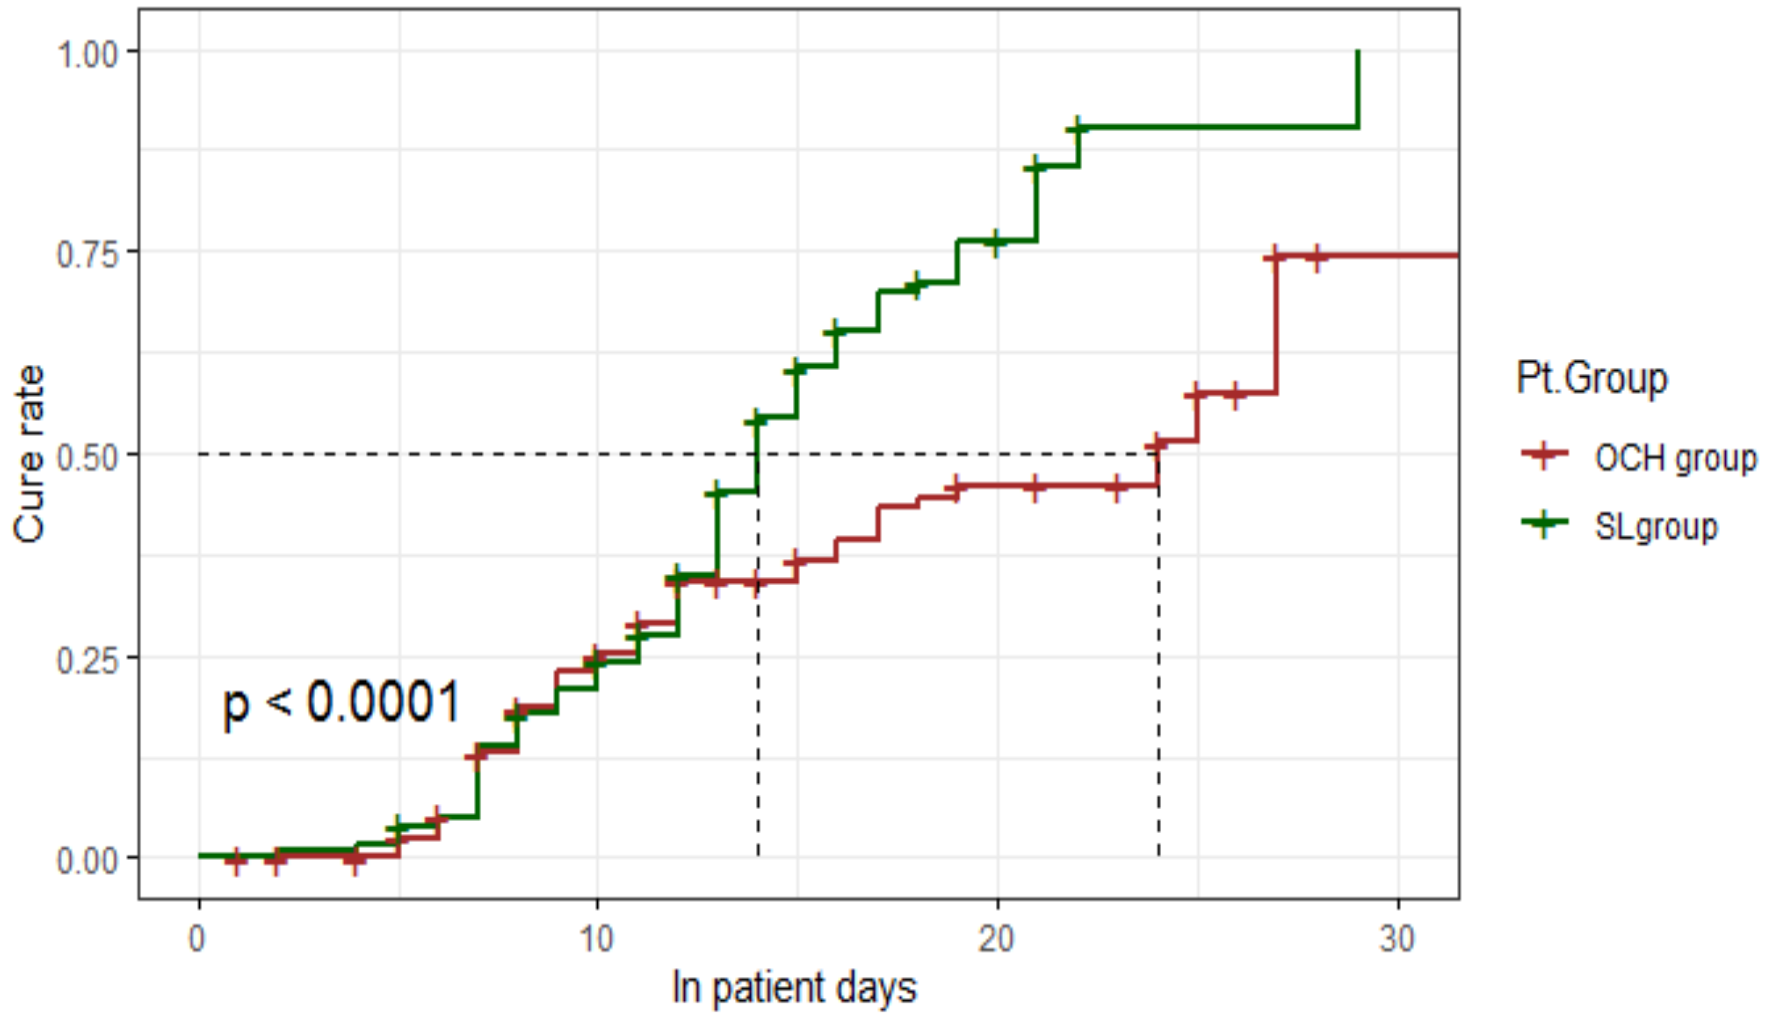

**Figure 2:** Kaplan-Meier plot for treatment groups time to clinical cure (log-rank=16.98).

Kaplan-Meier plot for treatment groups considering the overall patient length of stay

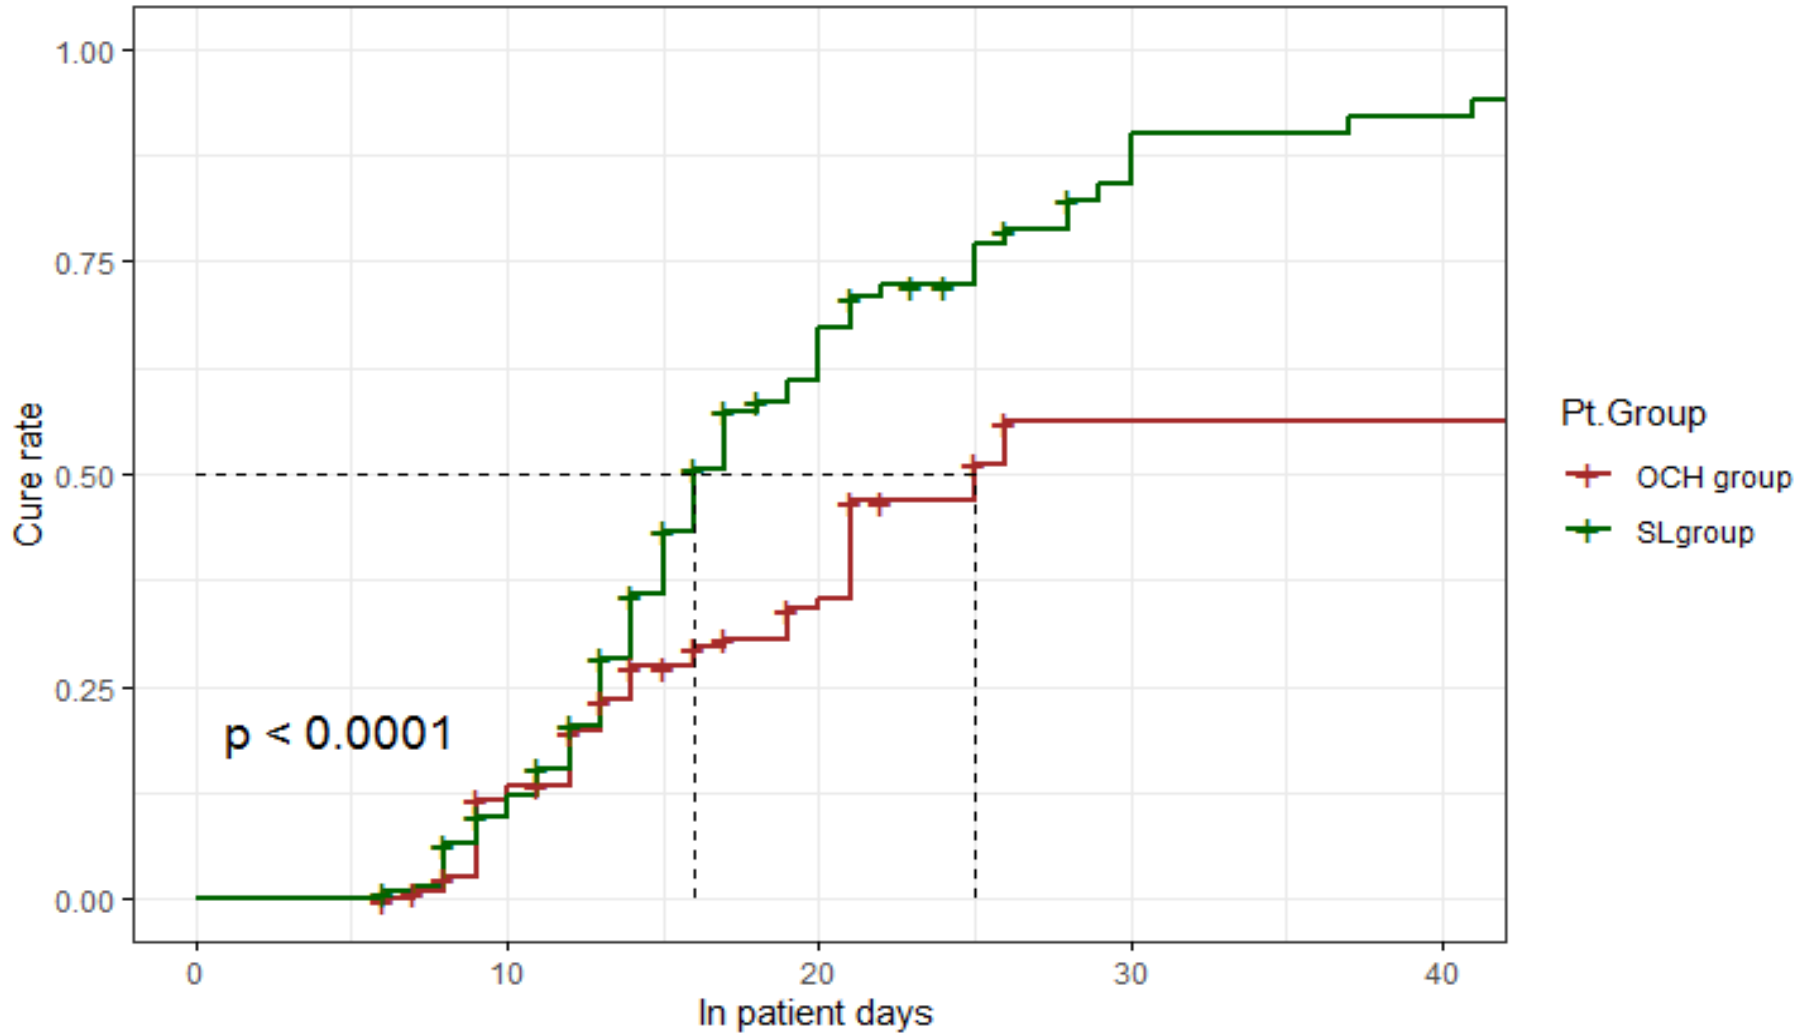

Figure 3: Kaplan-Meier plot for treatment groups considering the overall patient length of stay.

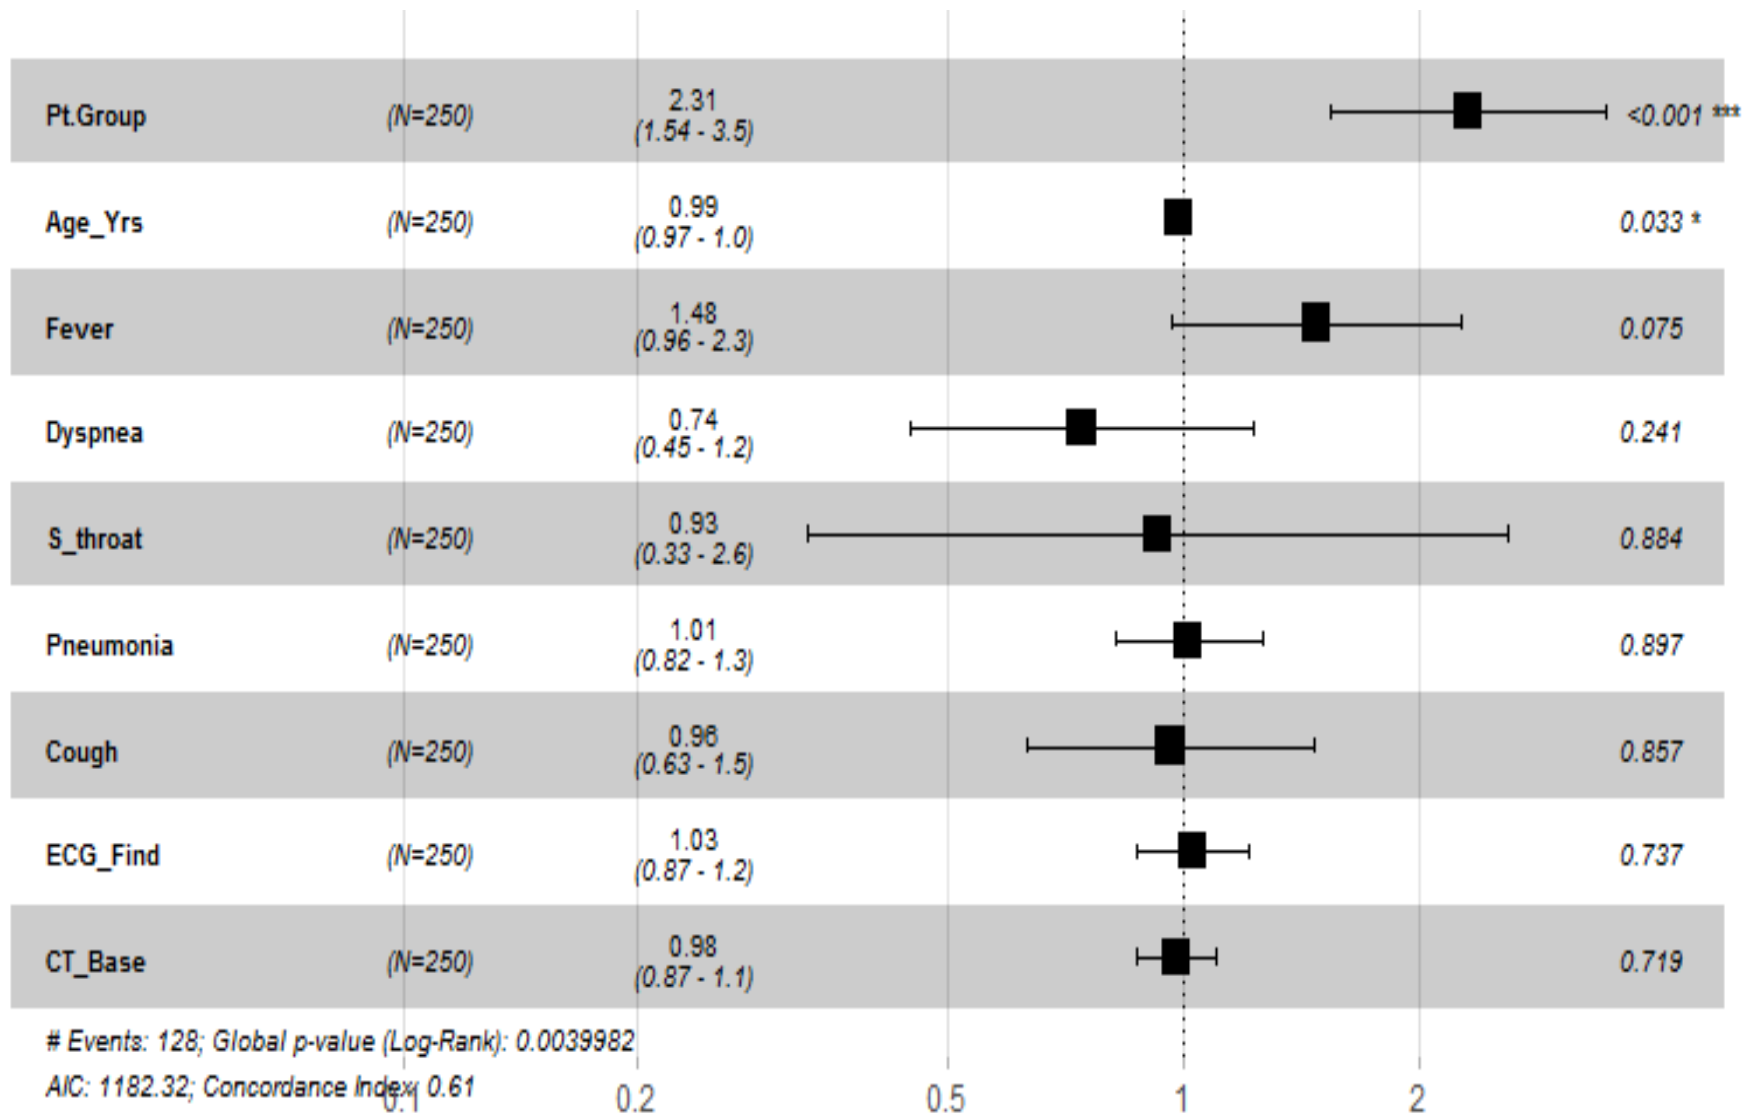

**Figure 4:** Cox regression between the treatments groups regarding suspected covariates at baseline.

# Kaplan\_Meier for treatment groups considering the PCR rate

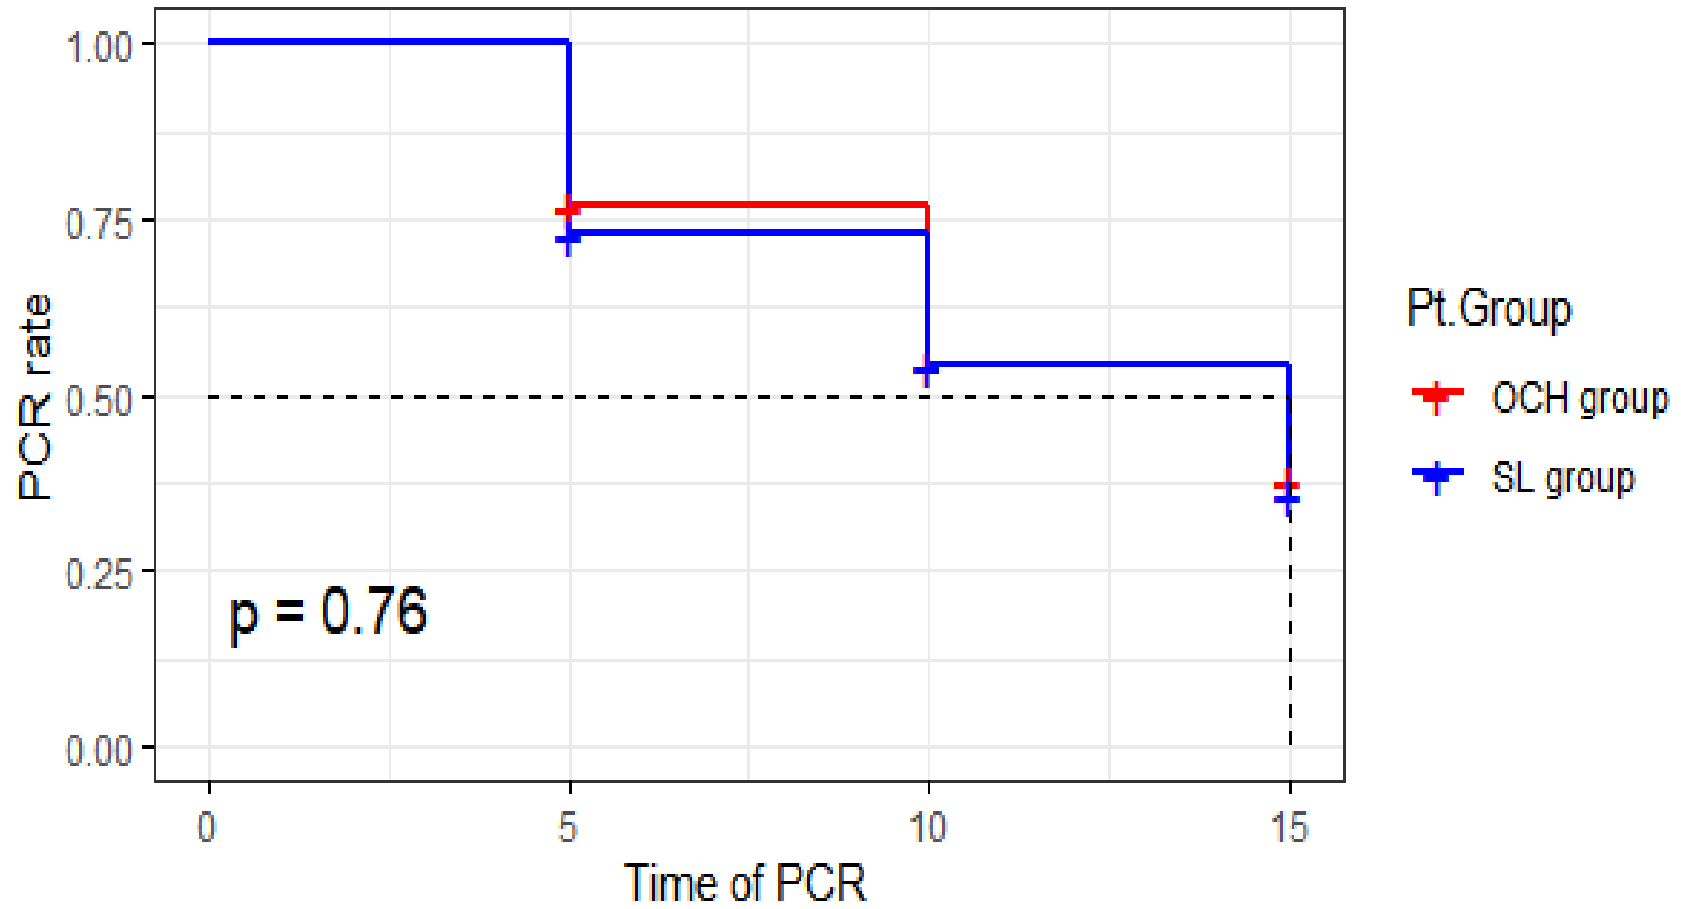

**Figure 5:** Kaplan-Meier plot for treatment groups considering the time to undetectable SARS-COV-2 RNA on two consecutive nasopharyngeal swabs.
