# Supplementary material for: Efficacy of Sofosbuvir plus Ledipasvir in Egyptian patients with COVID-19 compared to standard treatment: Randomized controlled trial
Source: bioRxiv or medRxiv preprint supplement (doi:10.1101/2021.05.19.21257429), 2021-05-21
Supplement: Supplementary file [file media-2.pdf]

**Table 1:** Baseline characteristics of the participants compared by independent t test. SL group: Sofosbuvir plus Ledipasvir, OCH group: Oseltamivir plus Hydroxychloroquine in combination with Azithromycin. Data were represented as mean  $\pm$  SD or frequency (percentage). NI: no information

| Parameter                                 |                               | S.L. group<br>(n=125) | OCH group<br>(n=125) | p-value |
|-------------------------------------------|-------------------------------|-----------------------|----------------------|---------|
| Age                                       |                               | 46.83 $\pm$ 15.24     | 40.24 $\pm$ 14.7     | 0.001   |
| Gender                                    | Male                          | 1 (0.8%)              | 0 (0%)               | 0.113   |
|                                           | Female                        | 89 (71.2%)            | 102 (81.6%)          |         |
| <b>Clinical and radiological findings</b> |                               |                       |                      |         |
| Fever                                     |                               | 71 (56.8%)            | 75 (60.0%)           | 1       |
| Sore Throat                               |                               | 3 (2.4%)              | 5 (4.0%)             | 1       |
| Dyspnea                                   |                               | 21 (16.8%)            | 21 (16.8%)           | 1       |
| Cough                                     |                               | 69 (55.2%)            | 59 (47.2%)           | 0.071   |
| Pneumonia                                 |                               | 90 (72.0%)            | 58 (46.4%)           | 0.003   |
| ECG abnormal                              |                               | 29 (23.2%)            | 35 (28.0%)           | 0.591   |
| ECG Findings                              | Normal                        | 90 (72.0%)            | 49 (39.2%)           | <0.001  |
|                                           | T Wave                        | 7 (5.6%)              | 3 (2.4%)             |         |
|                                           | QT Segment                    | 6 (4.8%)              | 13 (10.4%)           |         |
|                                           | Other                         | 16 (12.8%)            | 19 (15.2%)           |         |
| CT Chest                                  | Scattered Opacities           | 60 (48.0%)            | 48 (38.4%)           | <0.001  |
|                                           | Consolidated Patches          | 5 (4.0%)              | 6 (4.8%)             |         |
|                                           | GG appearance                 | 37 (29.6%)            | 65 (52.0%)           |         |
|                                           | Unremarkable                  | 0 (0.0%)              | 0 (0.0%)             |         |
|                                           | Lower Lobe<br>Pneumonia Patch | 10 (8.0%)             | 6 (4.8%)             |         |
|                                           | Scattered Pneumonia           | 13 (10.4%)            | 0 (0.0%)             |         |
| <b>Laboratory findings</b>                |                               |                       |                      |         |
| Total Leukocyte Count                     |                               | 5.92 $\pm$ 5.68       | 5.71 $\pm$ 2.37      | 0.720   |
| Neutrophils count                         |                               | 60.28 $\pm$ 13.00     | 58.69 $\pm$ 14.94    | 0.384   |
| Lymph                                     |                               | 33.87 $\pm$ 10.93     | 35.80 $\pm$ 14.15    | 0.239   |
| Neutrophil lymphocyte ratio               |                               | NI                    | 204.61 $\pm$ 73.68   | -       |
| Platelet count                            |                               | 209.29 $\pm$ 85.68    | NI                   | -       |
| Alanine transaminase                      |                               | 35.88 $\pm$ 29.19     | 29.62 $\pm$ 13.28    | 0.041   |
| Urea                                      |                               | 33.27 $\pm$ 14.88     | 1.13 $\pm$ 0.31      | <0.001  |
| Creatinine                                |                               | 1.15 $\pm$ 0.43       | 30.38 $\pm$ 19.82    | <0.001  |
| C-reactive protein                        |                               | NI                    | 318.18 $\pm$ 331.22  | -       |
| D-dimer                                   |                               | 357.75 $\pm$ 443.92   | 136.33 $\pm$ 140.27  | 0.019   |
| Serum ferritin                            |                               | 386.37 $\pm$ 510.42   | 195.80 $\pm$ 323.49  | 0.110   |
| Thyroglobulin                             |                               | 186.13 $\pm$ 102.17   | 219.39 $\pm$ 92.63   | 0.177   |
| Lactate dehydrogenase                     |                               | 255.76 $\pm$ 90.90    | 70.80 $\pm$ 132.85   | <0.001  |
| Fibrinogen                                |                               | 343.14 $\pm$ 84.16    | 261.60 $\pm$ 123.65  | 0.152   |

**Table 2:** Repeated measures ANOVA showing the change over time of the laboratory findings.

| Variable              | Within groups |               |         |               |               |         | Between groups |
|-----------------------|---------------|---------------|---------|---------------|---------------|---------|----------------|
|                       | S.L. Group    |               |         | OCH Group     |               |         |                |
|                       | pre           | post          | p-value | pre           | Post          | p-value | P-value        |
| Total Leukocyte Count | 6.63 ± 10.14  | 6.85 ± 3.44   | 0.319   | 5.92 ± 2.21   | 7.19 ± 3.7    | 0.016   | 0.075          |
| Neutrophils count     | 61.54 ± 14.92 | 57.59 ± 10.93 | 0.037   | 61.05 ± 14.03 | 58.58 ± 12.9  | 0.079   | 0.954          |
| Lymph                 | 33.33 ± 11.48 | 35.75 ± 10.53 | 0.166   | 35.91 ± 13.87 | 38.62 ± 13.88 | 0.043   | 0.636          |
| Urea                  | 37.78 ± 19.18 | 35.81 ± 13.66 | 0.229   | 0.98 ± 0.31   | 1.01 ± 0.29   | 0.859   | 0.489          |

Table (3): Comparison between the radiological changes based on CT findings at the three study points

|          |             | OCH        | SL         | p-value |
|----------|-------------|------------|------------|---------|
| CT day5  | Progressive | 19 (15.2%) | 24 (19.4%) | 0.244   |
|          | Regressive  | 42 (33.6%) | 42 (33.9%) |         |
|          | Stationary  | 40 (32.0%) | 46 (37.1%) |         |
| CT day10 | Progressive | 5 (4.0%)   | 6 (4.8%)   | 0.033   |
|          | Regressive  | 24 (19.2%) | 44 (35.5%) |         |
|          | Stationary  | 27 (21.6%) | 26 (21.0%) |         |
